# Supplementary material for: Mononuclear lanthanide complexes incorporating an anthracene group: structural modification, slow magnetic relaxation and multicomponent fluorescence emissions in Dy compounds
Source: Royal Society of Chemistry journal article supplement (doi:10.1039/c3dt51176f), 2013-01-01
Supplement: c3dt51176f.pdf [file c3dt51176f.pdf]

## Electronic Supporting Information

**Table S1** Selected bond angles (°) for **1**

|           |            |            |            |
|-----------|------------|------------|------------|
| O1-Dy1-O7 | 82.04(13)  | O6-Dy1-O5  | 73.19(11)  |
| O1-Dy1-O4 | 74.72(12)  | O1-Dy1-O1W | 78.00(13)  |
| O7-Dy1-O4 | 97.92(14)  | O7-Dy1-O1W | 145.06(12) |
| O1-Dy1-O8 | 145.99(11) | O4-Dy1-O1W | 104.01(13) |
| O7-Dy1-O8 | 90.00(12)  | O8-Dy1-O1W | 90.76(11)  |
| O4-Dy1-O8 | 139.28(11) | O6-Dy1-O1W | 141.44(11) |
| O1-Dy1-O6 | 133.63(14) | O5-Dy1-O1W | 69.35(11)  |
| O7-Dy1-O6 | 71.25(12)  | O1-Dy1-O9  | 76.47(11)  |
| O4-Dy1-O6 | 72.39(13)  | O7-Dy1-O9  | 71.54(12)  |
| O8-Dy1-O6 | 72.63(12)  | O4-Dy1-O9  | 150.45(11) |
| O1-Dy1-O5 | 125.45(12) | O8-Dy1-O9  | 69.65(10)  |
| O7-Dy1-O5 | 144.41(11) | O6-Dy1-O9  | 125.99(11) |
| O4-Dy1-O5 | 72.52(12)  | O5-Dy1-O9  | 131.64(10) |
| O8-Dy1-O5 | 77.96(10)  | O1W-Dy1-O9 | 76.05(11)  |

**Table S2** Selected bond angles (°) for **2**

|           |            |            |            |
|-----------|------------|------------|------------|
| O1-Gd1-O7 | 80.73(13)  | O6-Gd1-O5  | 73.60(11)  |
| O1-Gd1-O4 | 74.78(12)  | O1-Gd1-O1W | 78.59(12)  |
| O7-Gd1-O4 | 100.18(12) | O7-Gd1-O1W | 144.77(11) |
| O1-Gd1-O8 | 145.97(11) | O4-Gd1-O1W | 101.48(12) |
| O7-Gd1-O8 | 87.07(12)  | O8-Gd1-O1W | 94.40(11)  |
| O4-Gd1-O8 | 138.97(11) | O6-Gd1-O1W | 142.84(12) |
| O1-Gd1-O6 | 130.98(13) | O1W-Gd1-O5 | 69.70(10)  |
| O7-Gd1-O6 | 70.79(12)  | O1-Gd1-O9  | 76.57(11)  |
| O6-Gd1-O4 | 72.19(12)  | O7-Gd1-O9  | 71.17(11)  |
| O6-Gd1-O8 | 72.39(11)  | O4-Gd1-O9  | 151.08(11) |
| O1-Gd1-O5 | 127.75(11) | O8-Gd1-O9  | 69.43(10)  |
| O7-Gd1-O5 | 144.15(11) | O6-Gd1-O9  | 126.47(11) |
| O4-Gd1-O5 | 72.33(12)  | O5-Gd1-O9  | 130.65(10) |
| O8-Gd1-O5 | 78.37(10)  | O1W-Gd1-O9 | 76.45(10)  |

**Table S3** Selected bond angles (°) for **3**

|             |            |             |            |
|-------------|------------|-------------|------------|
| O4-Dy1-O1   | 145.96(15) | O7-Dy2-O10  | 144.62(15) |
| O4-Dy1-O13  | 75.54(15)  | O7-Dy2-O19  | 82.91(15)  |
| O1-Dy1-O13  | 78.75(14)  | O10-Dy2-O19 | 106.73(14) |
| O4-Dy1-O17  | 81.37(14)  | O7-Dy2-O22  | 111.54(14) |
| O1-Dy1-O17  | 107.84(14) | O10-Dy2-O22 | 80.19(14)  |
| O13-Dy1-O17 | 143.36(14) | O19-Dy2-O22 | 145.14(13) |
| O4-Dy1-O14  | 110.17(14) | O7-Dy2-O24  | 72.55(14)  |
| O1-Dy1-O14  | 83.42(15)  | O10-Dy2-O24 | 141.54(14) |
| O13-Dy1-O14 | 74.29(14)  | O19-Dy2-O24 | 82.02(14)  |
| O17-Dy1-O14 | 141.35(14) | O22-Dy2-O24 | 73.22(14)  |
| O4-Dy1-O16  | 71.75(14)  | O7-Dy2-O23  | 140.48(15) |
| O1-Dy1-O16  | 141.19(15) | O10-Dy2-O23 | 73.63(14)  |
| O13-Dy1-O16 | 117.31(13) | O19-Dy2-O23 | 72.62(14)  |
| O17-Dy1-O16 | 80.67(15)  | O22-Dy2-O23 | 77.04(13)  |
| O14-Dy1-O16 | 69.31(15)  | O24-Dy2-O23 | 73.67(13)  |
| O4-Dy1-O18  | 78.02(14)  | O7-Dy2-O21  | 75.31(15)  |
| O1-Dy1-O18  | 74.83(15)  | O10-Dy2-O21 | 78.08(14)  |
| O13-Dy1-O18 | 77.27(13)  | O19-Dy2-O21 | 144.28(14) |
| O17-Dy1-O18 | 70.31(14)  | O22-Dy2-O21 | 70.29(14)  |
| O14-Dy1-O18 | 146.98(14) | O24-Dy2-O21 | 116.72(13) |
| O16-Dy1-O18 | 140.69(15) | O23-Dy2-O21 | 139.71(15) |
| O4-Dy1-O15  | 139.34(14) | O7-Dy2-O20  | 77.07(14)  |
| O1-Dy1-O15  | 73.46(13)  | O10-Dy2-O20 | 74.68(14)  |
| O13-Dy1-O15 | 140.48(14) | O19-Dy2-O20 | 70.31(13)  |
| O17-Dy1-O15 | 73.26(13)  | O22-Dy2-O20 | 142.36(14) |
| O14-Dy1-O15 | 75.09(13)  | O24-Dy2-O20 | 140.97(14) |
| O16-Dy1-O15 | 73.16(13)  | O23-Dy2-O20 | 120.55(13) |
| O18-Dy1-O15 | 120.29(13) | O21-Dy2-O20 | 77.36(13)  |

**Table S4** Selected bond angles (°) for **4**

|            |            |            |            |
|------------|------------|------------|------------|
| O3-Gd1-O4  | 69.40(13)  | O3A-Gd1-O3 | 143.30(18) |
| O5-Gd1-O3  | 114.08(13) | O5-Gd1-O6A | 76.00(15)  |
| O3-Gd1-O6  | 70.95(12)  | O3-Gd1-O6A | 143.61(12) |
| O5-Gd1-O6  | 70.66(15)  | O6A-Gd1-O6 | 81.04(18)  |
| O5-Gd1-O4  | 83.02(15)  | O3-Gd1-O4A | 79.78(13)  |
| O6-Gd1-O4  | 116.52(13) | O5A-Gd1-O4 | 139.07(15) |
| O5-Gd1-O5A | 135.7(2)   | O6A-Gd1-O4 | 146.30(13) |
| O5A-Gd1-O3 | 80.18(13)  | O4A-Gd1-O4 | 65.54(17)  |

Symmetry code: A: -x + 1, y, -z + 3/2

**Table S5** The plane...plane distances and displacement angles of the stacking anthracene groups in **1-4** (these values are measured according to the related definitions in the paper: C. Janiak, *Dalton Trans.*, 2000, 3885.)

| compound                         | <b>1</b>             | <b>2</b>             | <b>3</b> |                      |                     | <b>4</b> |
|----------------------------------|----------------------|----------------------|----------|----------------------|---------------------|----------|
| plane...plane distance (Å)       | 3.443(1)             | 3.451(1)             | 3.367(1) | 3.608(1)             | 3.660(1)            | 3.554(1) |
| centroid...centroid distance (Å) | 3.757(1)             | 3.690(1)             | 3.737(1) | 3.686(1)             | 3.689(1)            | 3.645(1) |
| displacement angle (°)           | 23.5(1) <sup>o</sup> | 20.7(1) <sup>o</sup> | 25.7(1)  | 11.8(1) <sup>o</sup> | 7.1(1) <sup>o</sup> | 12.8(1)  |

**Table S6** The atoms were used to define the hfac planes of A, B and C around Dy(III) ions

| Dy(III) ion     | hfac plane of A          | hfac plane of B            | hfac plane of C            |
|-----------------|--------------------------|----------------------------|----------------------------|
| Dy1 in <b>1</b> | C31, C32, C33, O8, O9    | C26, C27, C28, O6, O7      | C21, C22, C23, O4, O5      |
| Gd1 in <b>2</b> | C31, C32, C33, O8, O9    | C26, C27, C28, O6, O7      | C21, C22, C23, O4, O5      |
| Dy1 in <b>3</b> | C50, C51, C52, O17, O18  | C45, C46, C47, O15, O16    | C40, C41, C42, O13, O14    |
| Dy2 in <b>3</b> | C98, C99, C100, O21, O22 | C103, C104, C105, O23, O24 | C93, C94, C95, O19, O20    |
| Gd1 in <b>4</b> | C21, C22, C23, O4, O5    | C26, C26A, C27, O6, O6A    | C21A, C22A, C23A, O4A, O5A |

**Table S7** Dihedral angle (°) between hfac planes (A, B and C)

|                        | A vs. B | A vs. C | B vs. C |
|------------------------|---------|---------|---------|
| around Dy1 in <b>1</b> | 43.7(1) | 57.6(1) | 79.5(1) |
| around Gd1 in <b>2</b> | 36.9(1) | 57.5(1) | 86.6(1) |
| around Dy1 in <b>3</b> | 86.2(1) | 13.6(1) | 80.2(1) |
| around Dy2 in <b>3</b> | 83.3(1) | 15.1(1) | 88.7(1) |
| around Gd1 in <b>4</b> | 82.2(1) | 17.8(1) | 82.2(1) |

**Table S8** Solid-state emission data of **1-4** at room temperature

| Compound | $\lambda_{\max}$ (nm) |
|----------|-----------------------|
| <b>1</b> | 487, 530, 575         |
| <b>2</b> | 487, 530              |
| <b>3</b> | 487, 529, 574         |
| <b>4</b> | 487, 530              |

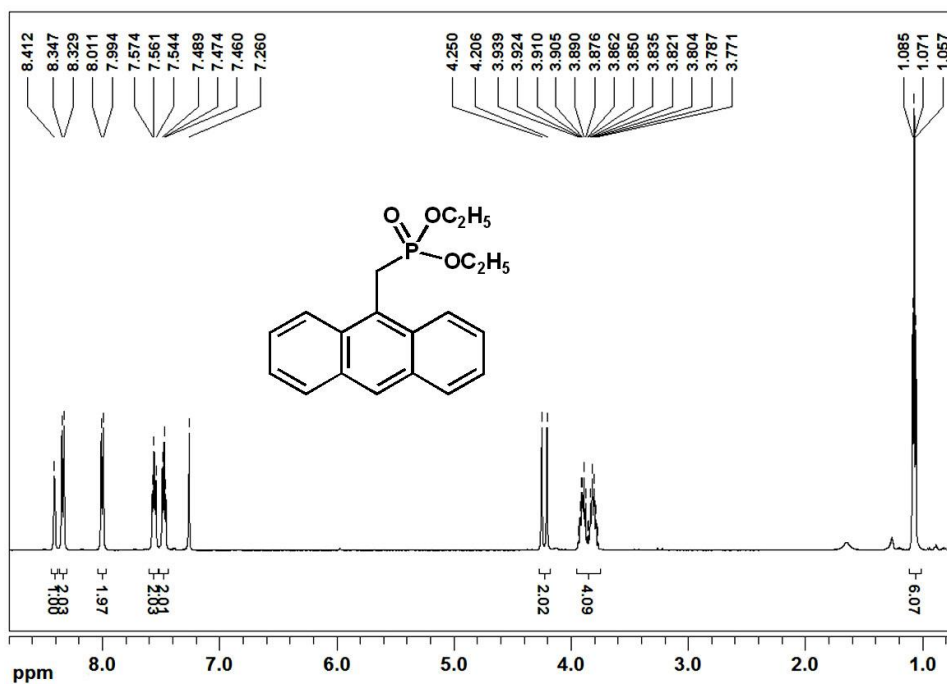

Fig. S1 <sup>1</sup>H NMR spectrum of depma (500 MHz, CDCl<sub>3</sub>).

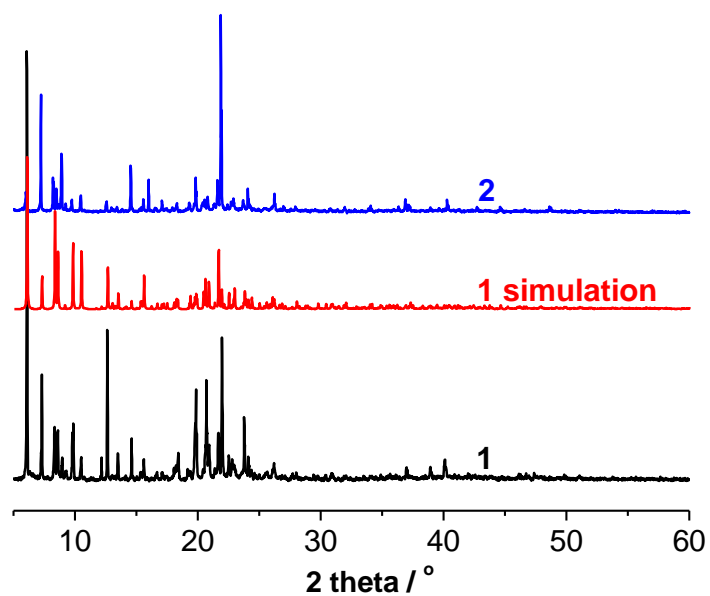

Fig. S2 Experimental XRD patterns of **1** and **2**, and simulated XRD pattern of **1**.

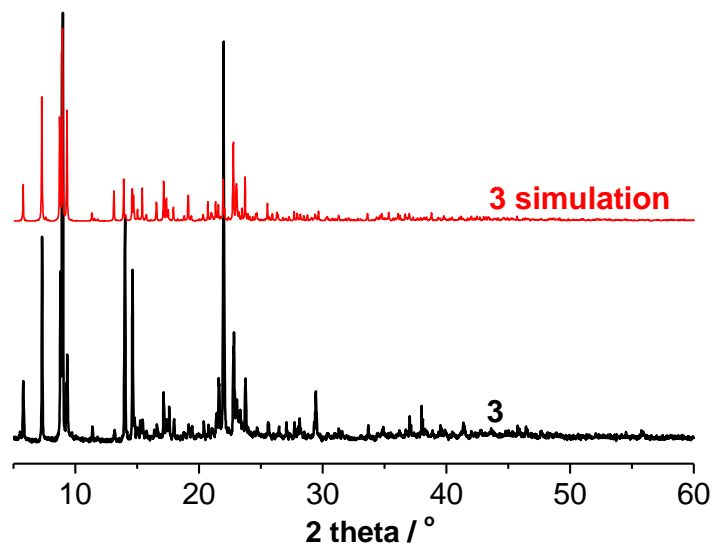

**Fig. S3** Experimental and simulated XRD patterns of **3**.

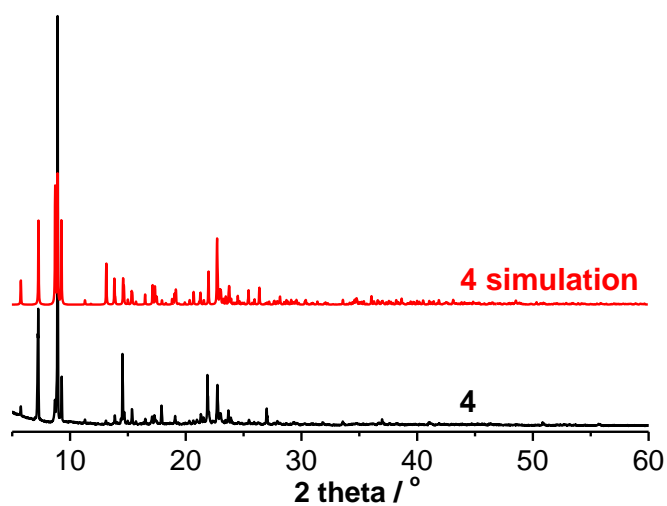

**Fig. S4** Experimental and simulated XRD patterns of **4**.

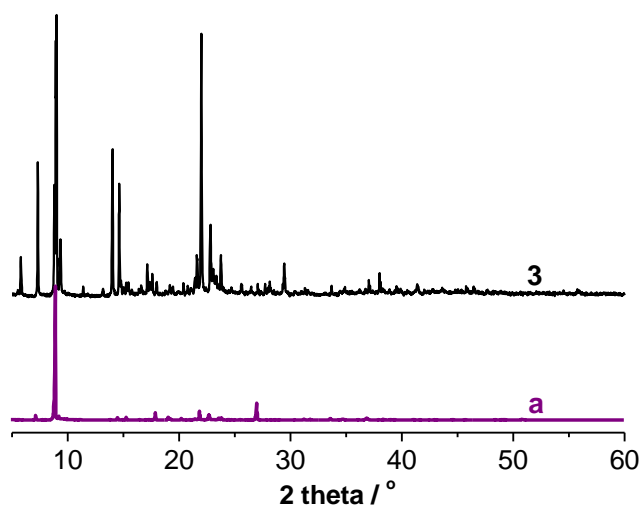

**Fig. S5** The XRD patterns of **3** and **a** sample from the reaction of **1** and depma.

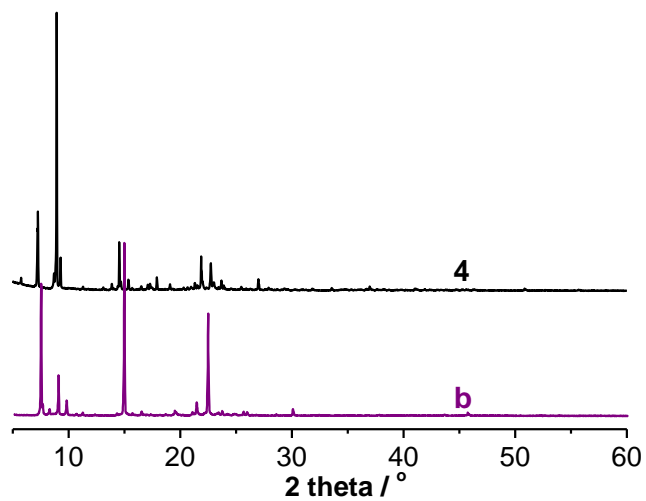

**Fig. S6** The XRD patterns of **4** and **b** sample from the reaction of **2** and depma.

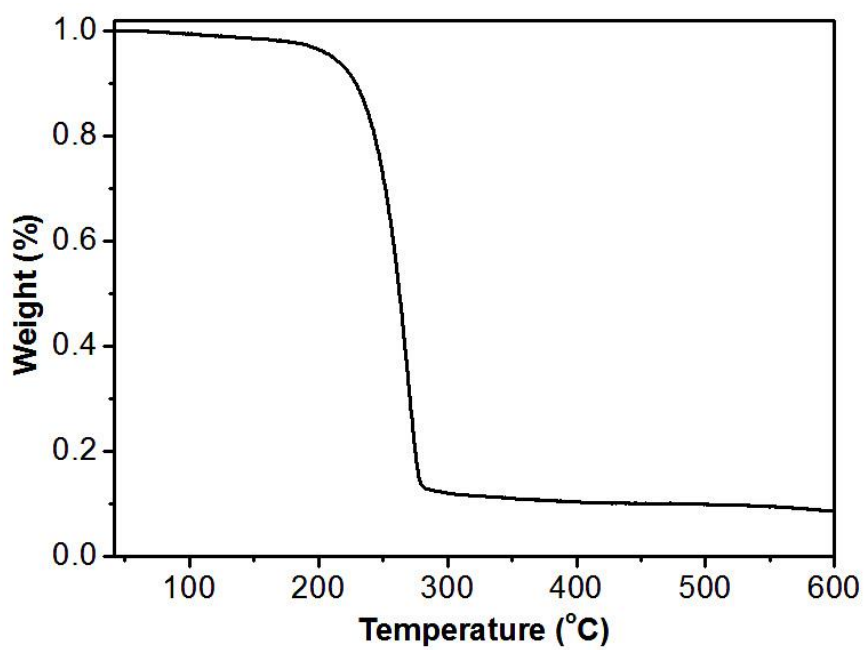

**Fig. S7** TG curve of compound **1**.

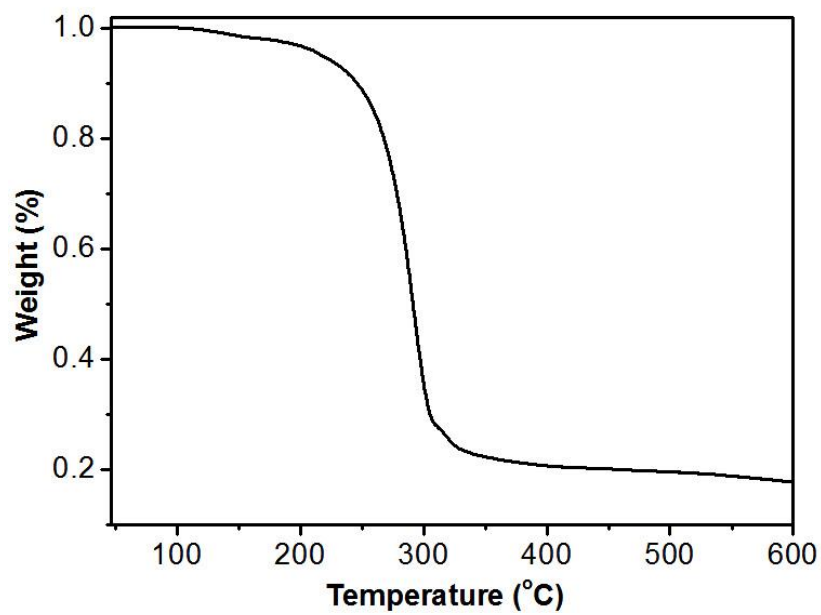

**Fig. S8** TG curve of compound 2.

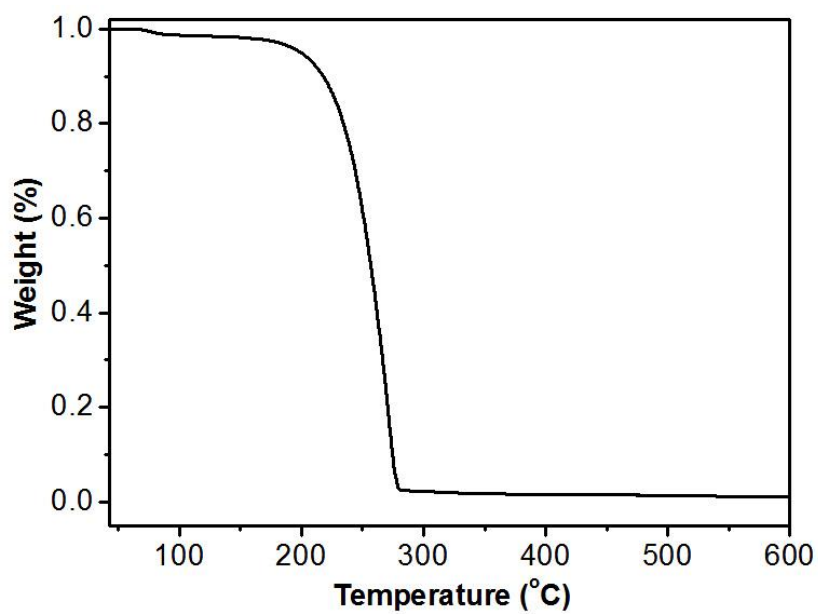

**Fig. S9** TG curve of compound 3.

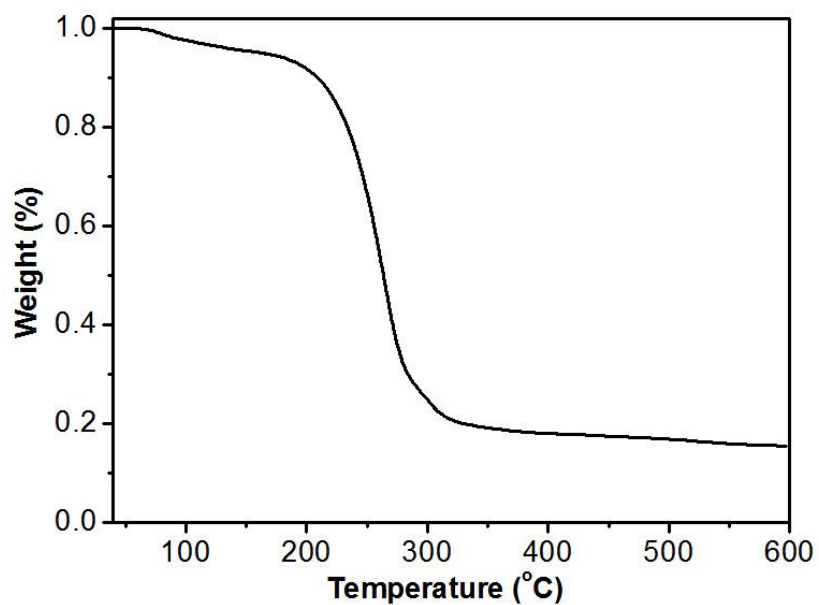

**Fig. S10** TG curve of compound **4**.

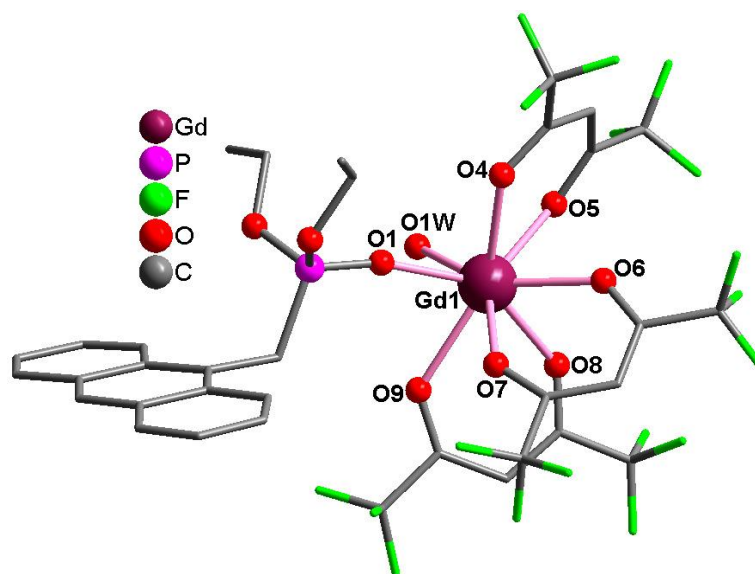

**Fig. S11** Molecular structure of **2**. All H atoms were omitted for clarity.



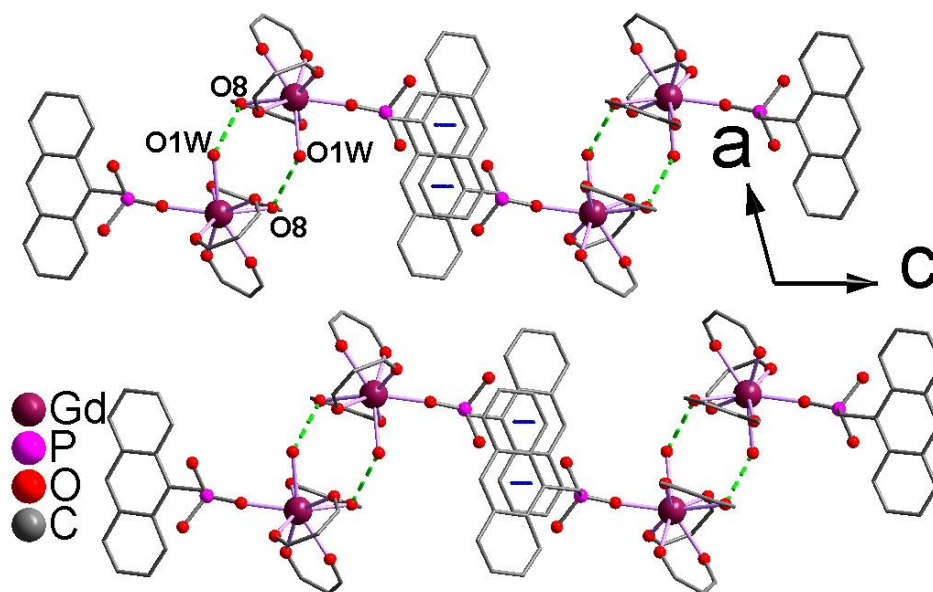

**Fig. S12** The packing structure of **2**. All H atoms and  $\text{CF}_3$  groups were omitted for clarity.

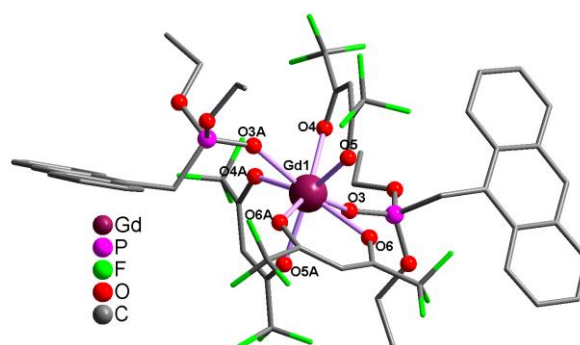

**Fig. S13** Molecular structure of **4**. All H atoms and lattice water were omitted for clarity.

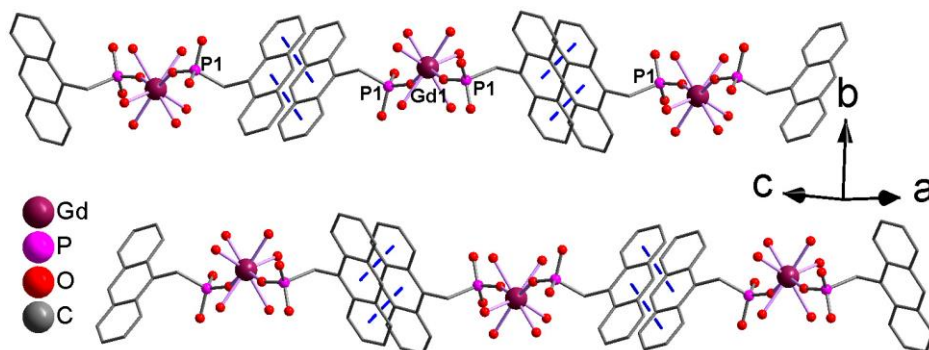

**Fig. S14** Supramolecular chain in **4**. All H atoms, non-oxygen atoms of hfac ligands, and  $\text{C}_2\text{H}_5$  groups attached to phosphonate oxygen atoms were omitted for clarity.

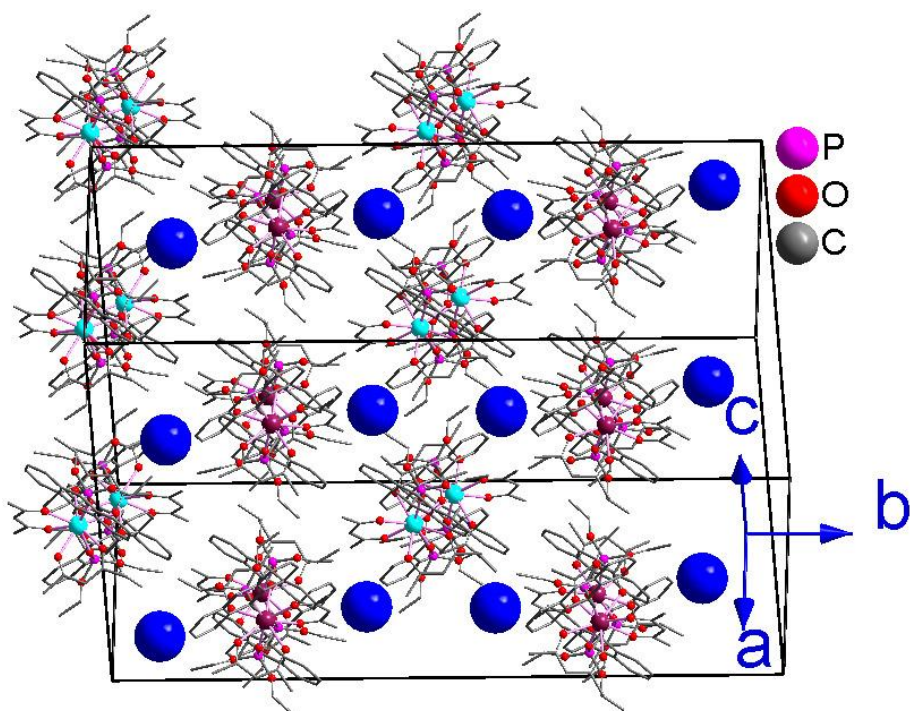

**Fig. S15** The packing structure of **3**. Blue small balls are lattice water molecules, and all H atoms and F atoms were omitted for clarity. Color code: Dy1, purple; Dy2, cyan; lattice water, blue ball.

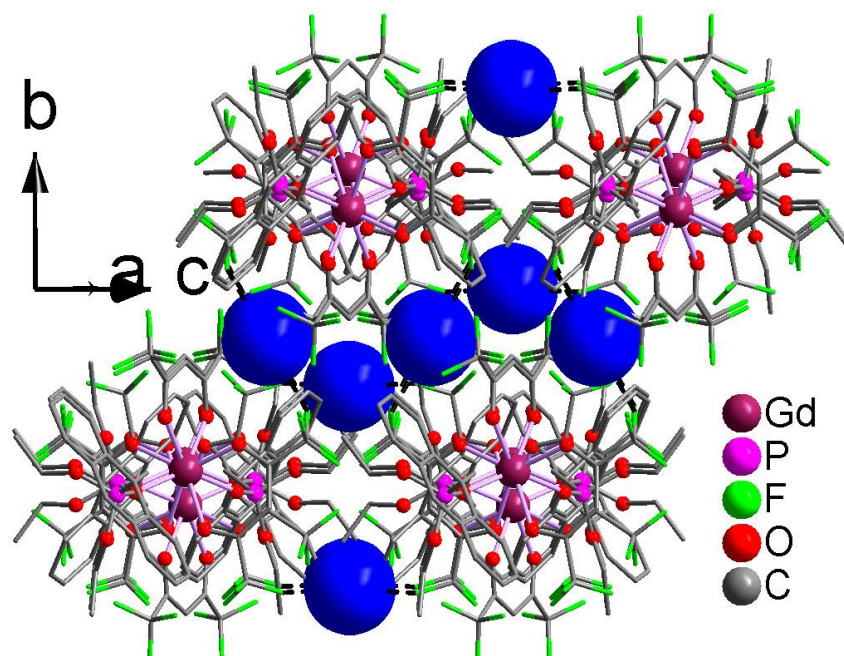

**Fig. S16** The supramolecular three dimensional structure of **4**. Blue small balls are lattice water molecules, and all H atoms and F atoms were omitted for clarity. Blue balls represent lattice water.

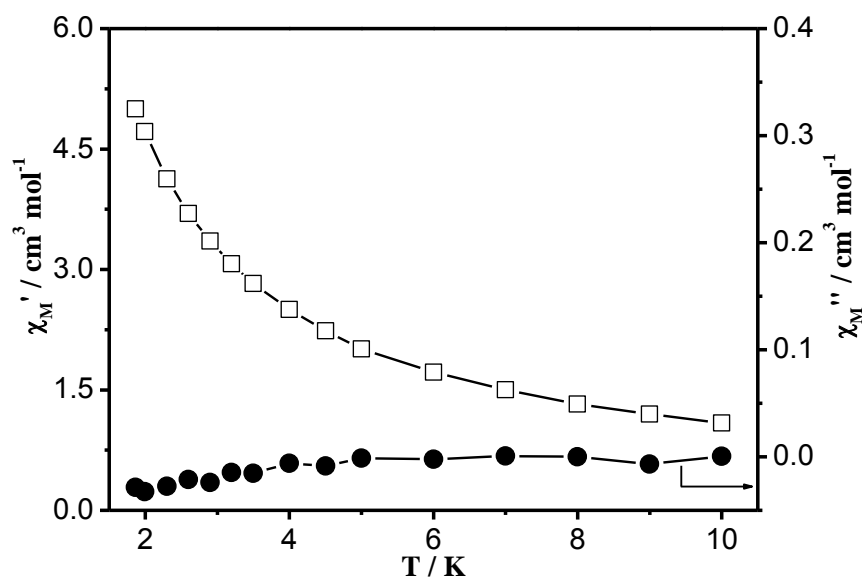

**Fig. S17** Temperature dependence of ac susceptibilities of in-phase  $\chi_M'$  and out-of-phase  $\chi_M''$  for **1** under zero static field with a frequency of 1000 Hz in the temperature range of 1.8-10 K.

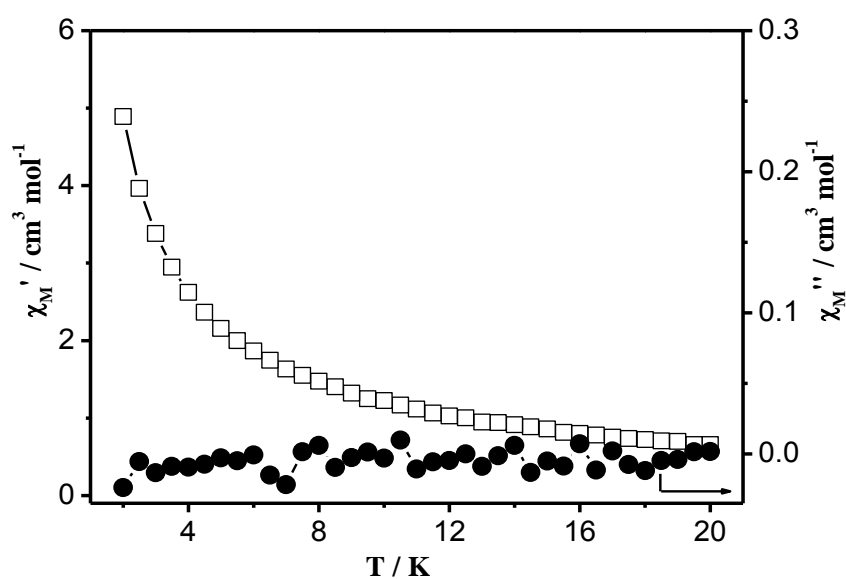

**Fig. S18** Temperature dependence of ac susceptibilities of in-phase  $\chi_M'$  and out-of-phase  $\chi_M''$  for **3** under zero static field with a frequency of 1000 Hz in the temperature range of 1.8-20 K.

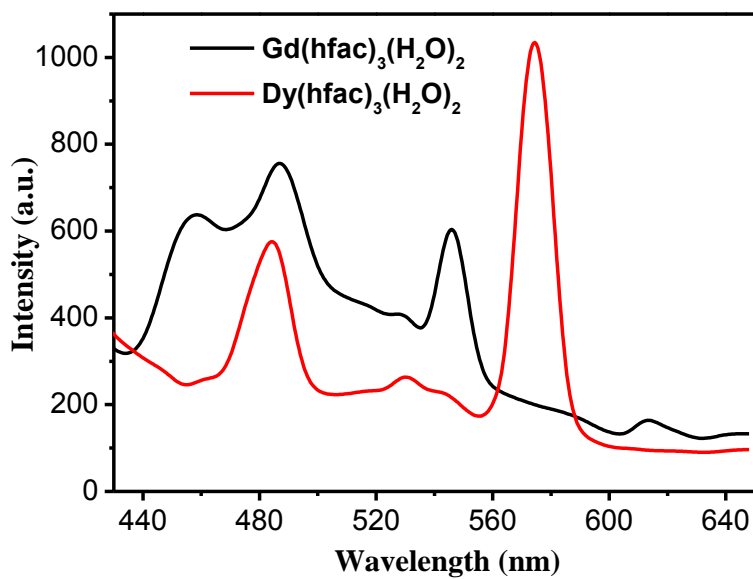

**Fig. S19** Solid-state emission spectra for  $\text{Gd}(\text{hfac})_2(\text{H}_2\text{O})_2$  and  $\text{Dy}(\text{hfac})_2(\text{H}_2\text{O})_2$  under  $\lambda_{\text{ex}} = 370$  nm at room temperature.

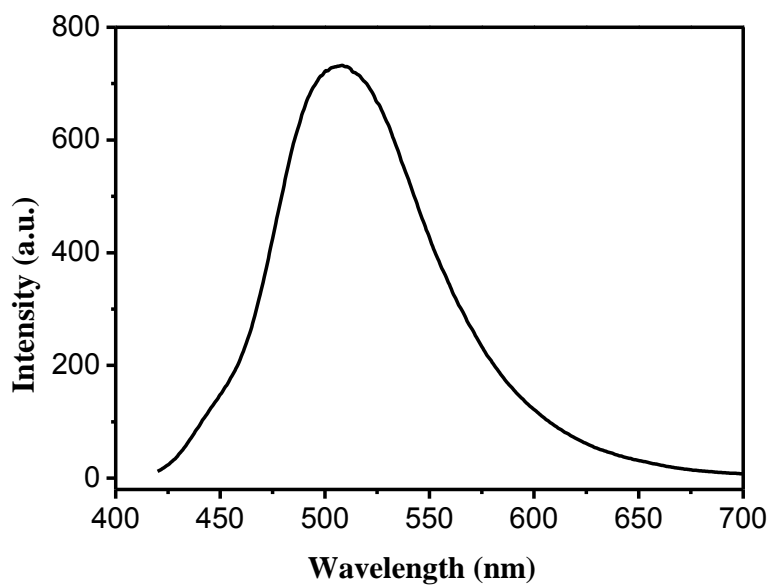

**Fig. S20** Solid-state emission spectrum of depma under  $\lambda_{\text{ex}} = 370$  nm at room temperature.
